# Supplementary material for: APC-Targeted DNA Vaccination Against Reticulocyte-Binding Protein Homolog 5 Induces Plasmodium falciparum-Specific Neutralizing Antibodies and T Cell Responses
Source: PubMed Central journal article supplement (PMC8558525; doi:10.3389/fimmu.2021.720550), 2021-10-18
Supplement: DataSheet_1.pdf [file DataSheet_1.pdf]

## Supplementary Figures

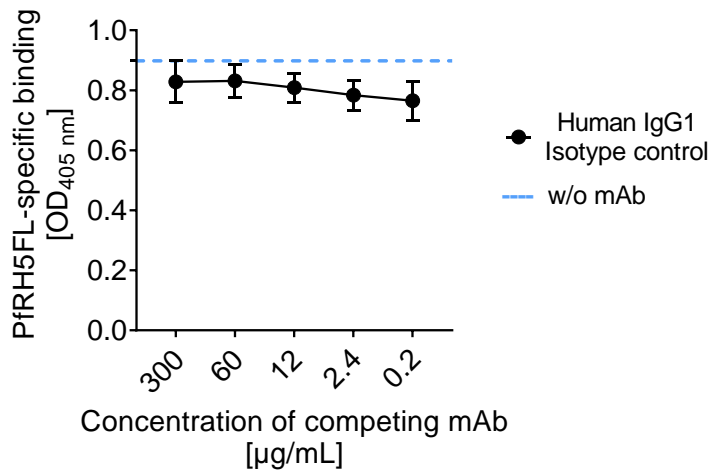

**Supplementary Figure 1. Isotype control do not prevent binding of PFRH5-specific sera to PFRH5 protein.** BALB/c mice ( $n = 6$ ) were vaccinated three times (day 0, 21 and 42) with 50  $\mu\text{g}$  DNA i.m./EP with scFv <sup>$\alpha\text{MHCII}$</sup> -PFRH5 $\Delta\text{NL}$  and sera harvested at day 62. Pooled sera were incubated with a titration (50, 10, 2, 0.4 and 0.08  $\mu\text{g/ml}$ ) of a human IgG isotype control antibody or without (w/o) mAb (stipled line) before binding to PFRH5FL protein were analyzed in ELISA. Samples were performed as technical triplicates (mean  $\pm$  SD).

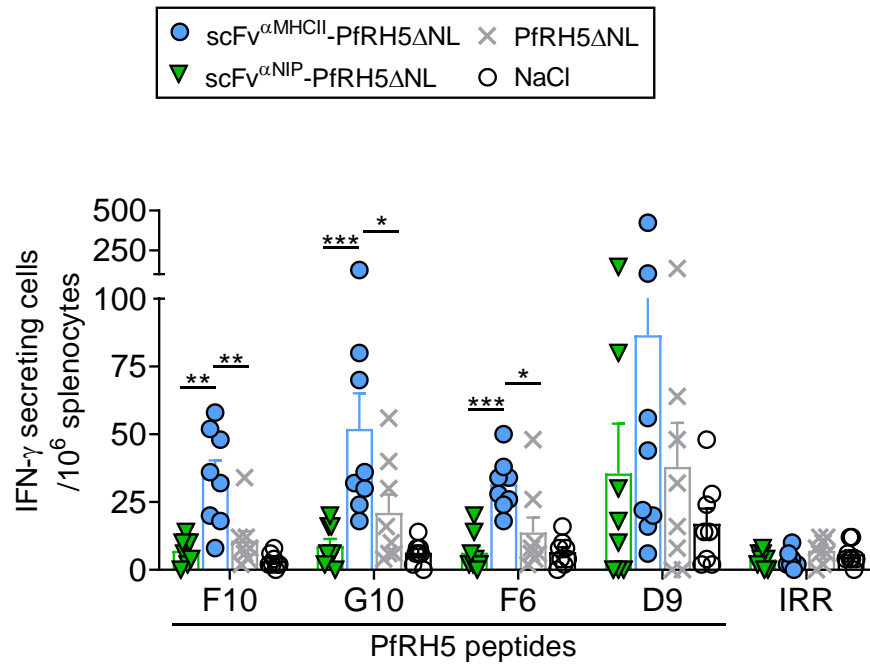

**Supplementary Figure 2. PfRH5ΔNL-containing targeted DNA vaccines induced rapid IFN- $\gamma$  T cell responses against PfRH5 peptides.** BALB/c mice were immunized i.m./EP with 50  $\mu$ g of indicated DNA plasmids or NaCl. Spleens were harvested at day 5 post vaccination and IFN- $\gamma$  producing splenocytes were measured by ELISPOT after stimulation with the indicated PfRH5 peptides or irrelevant control (IRR, IYSTVASSL from hemagglutinin). n = 8 mice/group (mean  $\pm$  SEM). \*p<0.05, \*\*p<0.01, two-tailed Mann-Whitney test.
